# Supplementary material for: Global Healthcare Needs Related to COVID-19: An Evidence Map of the First Year of the Pandemic
Source: MDPI journal article supplement (doi:10.3390/ijerph191610332), 2022-08-19
Supplement: s1 [file s1]

**Table S2. Search strategy used in the consulted databases**

Consistent with the nature of the present systematic evidence map, a broad search strategy was used to cover a wider scope of evidence including all publications associated with healthcare related needs during the first year of the COVID-19 pandemic.

Dates: 2019 to January 14, 2021

Databases: MEDLINE, Embase, Web of Science

## **MEDLINE**

Access platform: Ovid SP

Search Strategy:

| No. | Query                                                                                                                                                                                                                                                                                                                                                                    | Results | Annotations                                                                                                     |
|-----|--------------------------------------------------------------------------------------------------------------------------------------------------------------------------------------------------------------------------------------------------------------------------------------------------------------------------------------------------------------------------|---------|-----------------------------------------------------------------------------------------------------------------|
| 1   | (coronavirus or "covid19" or covid-19 or sars* or "2019-ncov" or "covid-2019" or "severe acute respiratory syndrome coronavirus 2").ti,ab,kw.                                                                                                                                                                                                                            | 108159  | Concept:<br><b>COVID-19</b>                                                                                     |
| 2   | Health Personnel/                                                                                                                                                                                                                                                                                                                                                        | 45907   | #2 to #5:<br><br>Concept:<br><b>Healthcare professionals</b>                                                    |
| 3   | Health Occupations/                                                                                                                                                                                                                                                                                                                                                      | 8428    |                                                                                                                 |
| 4   | health care worker*.ti,ab.                                                                                                                                                                                                                                                                                                                                               | 13998   |                                                                                                                 |
| 5   | (health adj2 (personnel or occupation*)).ti,ab.                                                                                                                                                                                                                                                                                                                          | 23191   |                                                                                                                 |
| 6   | 1 or 2 or 3 or 4 or 5                                                                                                                                                                                                                                                                                                                                                    | 190303  | <b>COVID-19</b><br>OR<br><b>Healthcare professionals</b>                                                        |
| 7   | Needs Assessment/                                                                                                                                                                                                                                                                                                                                                        | 30900   | Concept:<br><b>Needs Assessment</b>                                                                             |
| 8   | ((assessment or determination) adj3 ("health care needs" or "healthcare needs")).mp. [mp=title, abstract, original title, name of substance word, subject heading word, floating sub-heading word, keyword heading word, organism supplementary concept word, protocol supplementary concept word, rare disease supplementary concept word, unique identifier, synonyms] | 103     | Concept:<br><b>Healthcare needs assessment</b>                                                                  |
| 9   | ((healthcare or social or support) adj need*).ti,ab,kw.                                                                                                                                                                                                                                                                                                                  | 7405    | Concept:<br><b>Healthcare or related needs</b>                                                                  |
| 10  | 7 or 8 or 9                                                                                                                                                                                                                                                                                                                                                              | 37658   | <b>Needs assessment</b><br>OR<br><b>Healthcare needs assessment</b><br>OR<br><b>Healthcare or related needs</b> |

| No. | Query                          | Results | Annotations                                                                                                                                                                                                                                                    |
|-----|--------------------------------|---------|----------------------------------------------------------------------------------------------------------------------------------------------------------------------------------------------------------------------------------------------------------------|
| 11  | 6 and 10                       | 1442    | ( <i>COVID-19</i> OR <i>Healthcare professionals</i> )<br>AND<br>( <i>Needs assessment</i> OR <i>Healthcare needs assessment</i> OR <i>Healthcare or related needs</i> )                                                                                       |
| 12  | limit 11 to yr="2019 -Current" | 452     | ( <i>COVID-19</i> OR <i>Healthcare professionals</i> )<br>AND<br>( <i>Needs assessment</i> OR <i>Healthcare needs assessment</i> OR <i>Healthcare or related needs</i> )<br>limited by dates specified (limits results to 2019 – current).<br><br>Final result |

## Embase

Access platform: Elsevier

Search strategy:

| No. | Query                                                     | Results | Annotations                                                                                                                                                                                                                                                 |
|-----|-----------------------------------------------------------|---------|-------------------------------------------------------------------------------------------------------------------------------------------------------------------------------------------------------------------------------------------------------------|
| 12  | #6 AND #10 AND [2019-2021]/py                             | 541     | ( <i>COVID-19</i> OR <i>Healthcare professionals</i> )<br>AND<br>( <i>Needs assessment</i> OR <i>Healthcare needs assessment</i> OR <i>Healthcare or related needs</i> )<br>limited by dates specified (limits results to 2019 – 2021).<br><br>Final result |
| 11  | #6 AND #10                                                | 12,272  | ( <i>COVID-19</i> OR <i>Healthcare professionals</i> )<br>AND<br>( <i>Needs assessment</i> OR <i>Healthcare needs assessment</i> OR <i>Healthcare or related needs</i> )                                                                                    |
| 10  | #7 OR #8 OR #9                                            | 37,138  | <i>Needs assessment</i><br>OR<br><i>Healthcare needs assessment</i><br>OR<br><i>Healthcare or related needs</i>                                                                                                                                             |
| 9   | ((healthcare OR social OR support) NEAR/1 need*):ti,ab,de | 13,006  | Concept:<br><i>Healthcare or related needs</i>                                                                                                                                                                                                              |

| No. | Query                                                                                                                                                                                              | Results | Annotations                                                  |
|-----|----------------------------------------------------------------------------------------------------------------------------------------------------------------------------------------------------|---------|--------------------------------------------------------------|
| 8   | ((assessment OR determination) NEAR/3 ('health care needs' OR 'healthcare needs')):ti,ab,de                                                                                                        | 125     | Concept:<br><b>Healthcare needs assessment</b>               |
| 7   | 'needs assessment'/exp                                                                                                                                                                             | 24,799  | Concept:<br><b>Needs Assessment</b>                          |
| 6   | #1 OR #2 OR #3 OR #4 OR #5                                                                                                                                                                         | 342,452 | <b>COVID-19</b><br>OR<br><b>Healthcare professionals</b>     |
| 5   | ((health OR medical) NEAR/2 (personnel OR occupation* OR profession*)):ti,ab                                                                                                                       | 174,155 | #2 to #5:<br><br>Concept:<br><b>Healthcare professionals</b> |
| 4   | 'health care worker*':ti,ab                                                                                                                                                                        | 16,922  |                                                              |
| 3   | 'medical profession'/exp                                                                                                                                                                           | 27,247  |                                                              |
| 2   | 'health care personnel'/mj                                                                                                                                                                         | 29,968  |                                                              |
| 1   | coronavirus:ti,ab,de OR 'covid19':ti,ab,de OR 'covid 19':ti,ab,de OR sars*:ti,ab,de OR '2019-ncov':ti,ab,de OR 'covid-2019':ti,ab,de OR 'severe acute respiratory syndrome coronavirus 2':ti,ab,de | 113,811 | Concept:<br><b>COVID-19</b>                                  |

## Web of Science

Access platform: Clarivate

Search strategy:

| No. | Query                     | Results | Annotations                                                                                                                                                                                                           |
|-----|---------------------------|---------|-----------------------------------------------------------------------------------------------------------------------------------------------------------------------------------------------------------------------|
| 9   | #8 limited to 2019 – 2021 | 633     | <b>(Healthcare or related needs OR Healthcare needs assessment)</b><br>AND<br><b>(COVID-19 OR Healthcare professionals)</b><br>limited by dates specified (limits results to 2019 – 2021).<br><br><b>Final result</b> |
| 8   | #7 AND #4                 | 1,314   | <b>(Healthcare or related needs OR Healthcare needs assessment)</b><br>AND                                                                                                                                            |

| No. | Query                                                                                                                                   | Results | Annotations                                                                    |
|-----|-----------------------------------------------------------------------------------------------------------------------------------------|---------|--------------------------------------------------------------------------------|
|     |                                                                                                                                         |         | ( <i>COVID-19</i> OR <i>Healthcare professionals</i> )                         |
| 7   | #6 OR #5                                                                                                                                | 46,948  | <i>Healthcare or related needs</i><br>OR<br><i>Healthcare needs assessment</i> |
| 6   | TS= ((healthcare or social or support) NEAR/1 need*)                                                                                    | 46,861  | Concept:<br><i>Healthcare or related needs</i>                                 |
| 5   | TS= ((assessment or determination) NEAR/3 ("health care needs" or "healthcare needs"))                                                  | 12      | Concept:<br><i>Healthcare needs assessment</i>                                 |
| 4   | #3 OR #2 OR #1                                                                                                                          | 174,049 | <i>COVID-19</i><br>OR<br><i>Healthcare professionals</i>                       |
| 3   | TS= (coronavirus or "covid19" or covid-19 or sars* or "2019-ncov" or "covid-2019" or "severe acute respiratory syndrome coronavirus 2") | 102,959 | Concept:<br><i>COVID-19</i>                                                    |
| 2   | TS= health care worker*                                                                                                                 | 42,186  | #1 to #2:<br><br>Concept:<br><i>Healthcare professionals</i>                   |
| 1   | TS= (health NEAR/2 (personnel or occupation*))                                                                                          | 34,687  |                                                                                |
