# Supplementary material for: Global Healthcare Needs Related to COVID-19: An Evidence Map of the First Year of the Pandemic
Source: MDPI journal article supplement (doi:10.3390/ijerph191610332), 2022-08-19
Supplement: s1 [file s1]

Archive with 8 entries (8 files):
- Table S1_PRISMAchecklist.pdf
- Table S2_SearchStrategy.pdf
- Table S3_ExcludedStudies.pdf
- Table S4_DescriptiveSummaryIncludedStudies.pdf
- Table S5_HCPNeeds.pdf
- Table S6_PatientNeeds.pdf
- Table S7_FamilyNeeds.pdf
- Table S8_TransversalNeeds.pdf
